# Supplementary material for: Serine Protease-Mediated Cutaneous Inflammation: Characterization of an Ex Vivo Skin Model for the Assessment of Dexamethasone-Loaded Core Multishell-Nanocarriers
Source: MDPI journal article supplement (doi:10.3390/pharmaceutics12090862), 2020-09-10
Supplement: s1 [file s1]

# Serine protease-mediated cutaneous inflammation: Characterization of an *ex vivo* skin model for the assessment of dexamethasone-loaded core multishell- nanocarriers

Frombach J.<sup>1</sup>, Rancan F.<sup>1</sup>, Kübrich K.<sup>1</sup>, Schumacher F.<sup>2</sup>, Unbehauen M.<sup>3</sup>, Blume-Peytavi U.<sup>1</sup>, Haag R.<sup>3</sup>, Kleuser B.<sup>2</sup>, Sabat R.<sup>4</sup>, Wolk K.<sup>4</sup> and Vogt A.<sup>1</sup>

<sup>1</sup>Clinical Research Center for Hair and Skin Science, Department of Dermatology, Venereology and Allergy, Charité-Universitätsmedizin Berlin, corporate member of Freie Universität Berlin, Humboldt-Universität zu Berlin, and Berlin Institute of Health, Germany.

<sup>2</sup>Institute of Nutritional Science, University of Potsdam, Potsdam, Germany

<sup>3</sup>Organic Chemistry, Institute of Chemistry and Biochemistry, Freie Universität Berlin, Berlin, Germany

<sup>4</sup>Psoriasis Research and Treatment Center, Department of Dermatology, Venerology and Allergy/Institute for Medical Immunology, Charité-Universitätsmedizin Berlin, corporate member of Freie Universität Berlin, Humboldt-Universität zu Berlin, and Berlin Institute of Health, Germany.

Corresponding Author: annika.vogt@charite.de

## Supplemental material

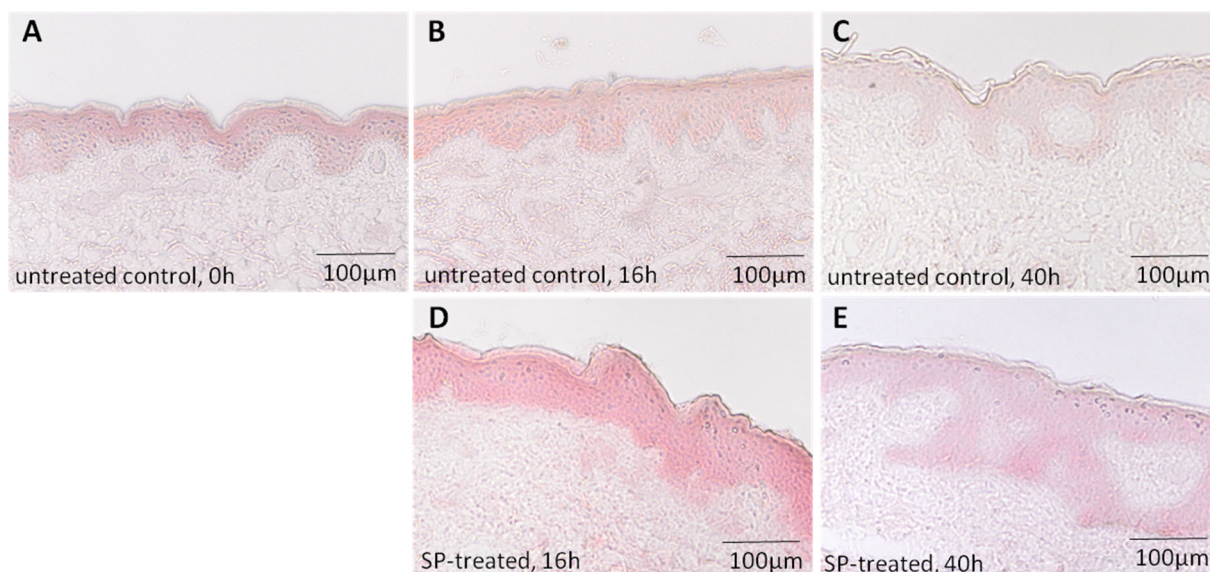

**Figure S1: Histological assessment of *ex vivo* human skin treated with SP.** (A-E) Images of representative HE-stained untreated (A-C) and SP-treated (D,E) skin sections show a homogeneous histopathological structure of all skin samples over incubation period of 16 and 40 h.

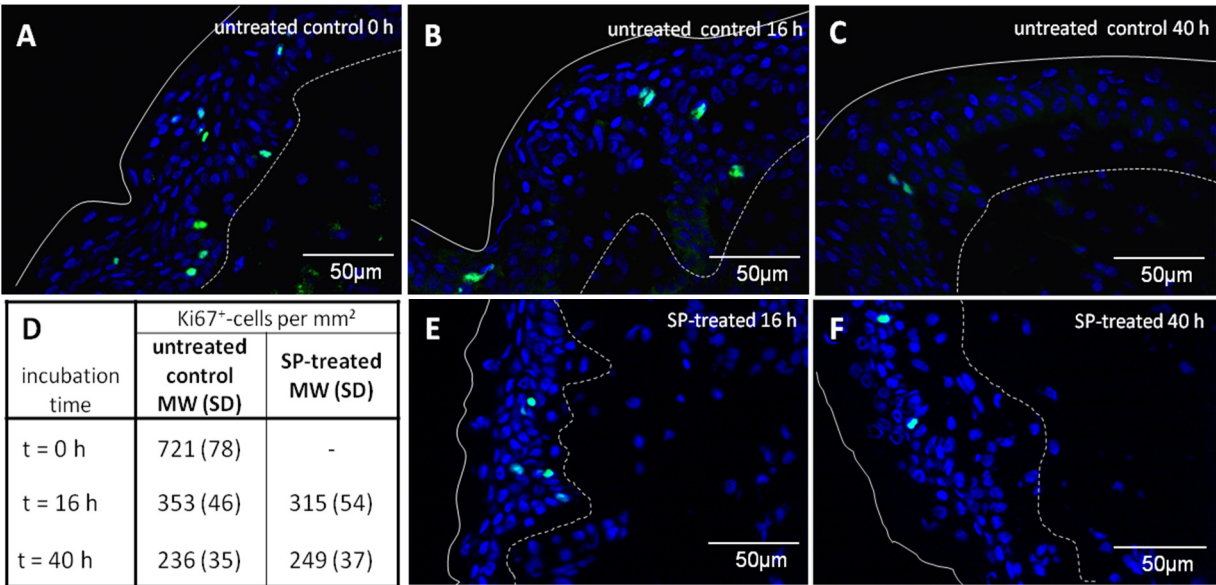

**Figure S2: Influence of SP treatment on epidermis cell proliferation in *ex vivo* human skin.** Immunofluorescence images of untreated (A-C) and SP-treated skin (E, F) sections were prepared after 0 h, 16 h and 40 h of incubation. Ki67<sup>+</sup>-cells are stained green and cell nuclei blue. **(D)** The number of proliferating cells counted per mm<sup>2</sup> skin (n=3).

26

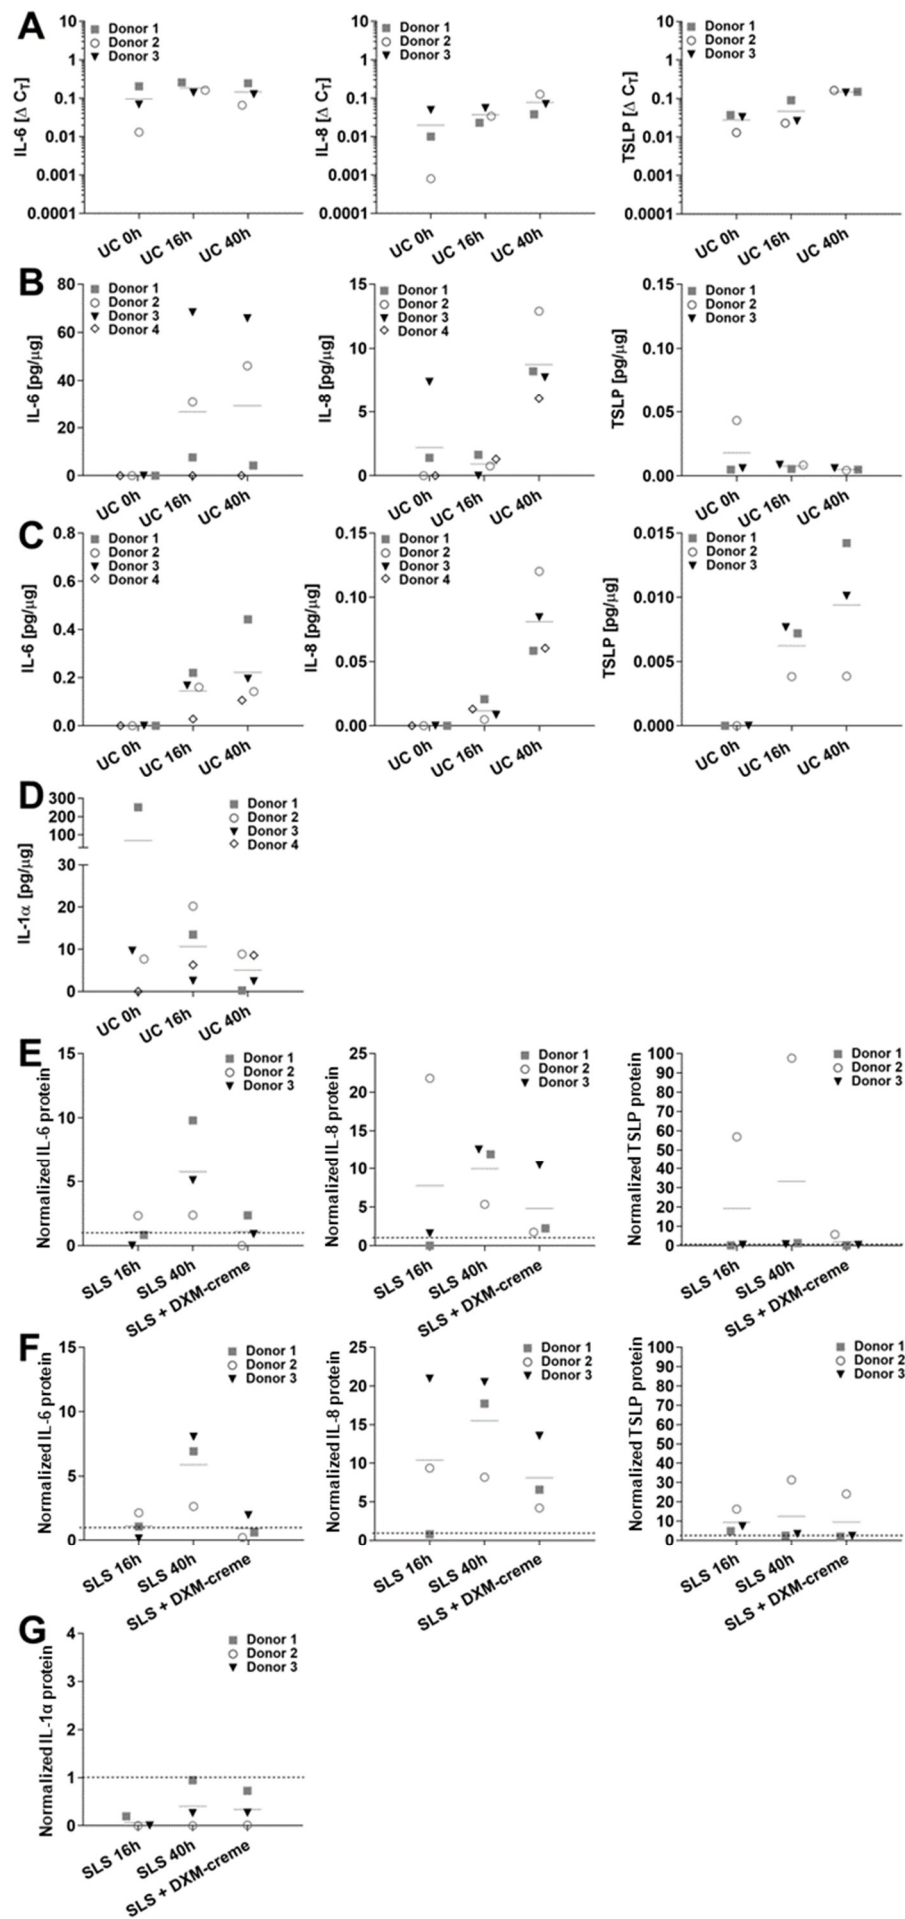

**Figure S3: Expression of pro-inflammatory markers IL-6, IL-8, TSLP and IL-1 $\alpha$  in *ex vivo* human skin.** (A) mRNA-quantification of untreated control (UC) samples by individual qPCR assays: Target gene expressions were normalized to housekeeping gene (hypoxanthine-guanine phosphoribosyltransferase, HPRT) expression. (B-D) Quantification of protein of untreated control samples (UC) in different skin layers (B = dermis, C = epidermis, D = superficial *stratum corneum*) by individual ELISA assays: results were normalized to the total protein content of each lysate. (E-G) Quantification of protein expression of sodium laryl sulfate (SLS)-treated samples in different skin layers. Short lines indicate the means of the different donors for each sample (E = dermis, F = epidermis, G = superficial *stratum corneum*) by individual ELISA assays: results were normalized to the total protein content of each lysate and depicted as multiples of untreated controls for the same incubation period. Spotted lines indicate the expression level of untreated controls (at  $y = 1$ ).

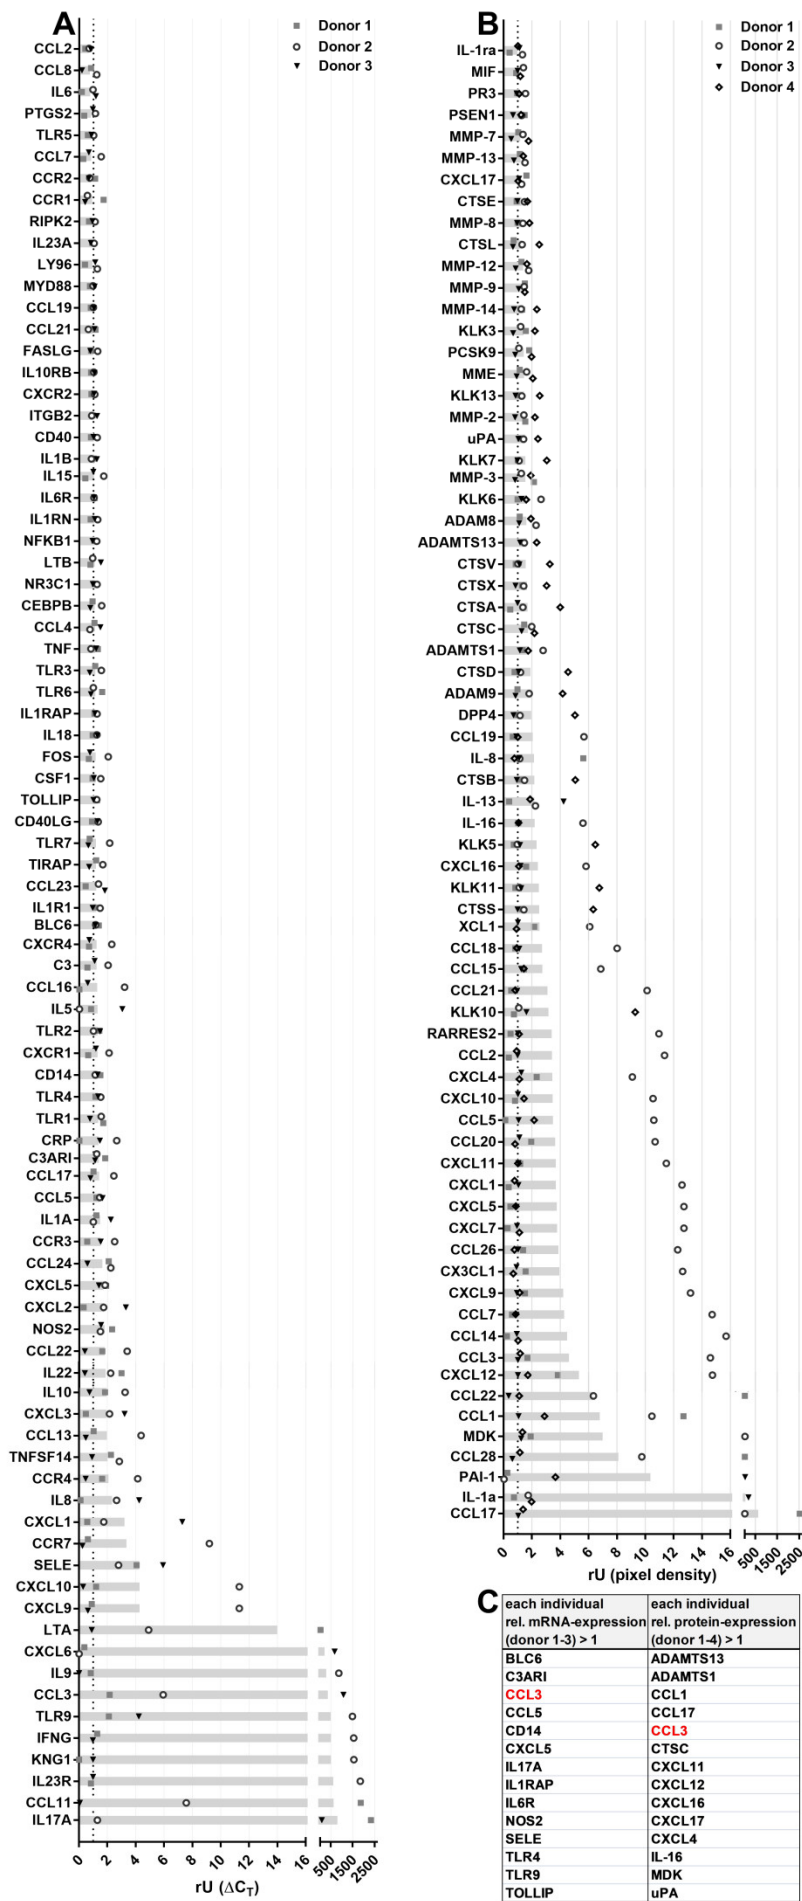

**Figure S4: Relative expression profiles of pro-inflammatory mediators in *ex vivo* human skin after SP treatment.** All data of each donor were depicted as multiples of untreated controls for the same incubation period. Bars represent the means of the different donors for each sample. Spotted lines indicate the expression level of untreated controls (at  $y = 1$ ). (A) Quantification of mRNA (84 species) by Inflammatory Response & Autoimmunity RT<sup>2</sup> Profiler PCR Array after 16 h incubation, normalized to the expression of the housekeeping gene hypoxanthine-guanine phosphoribosyltransferase (HPRT). (B) Quantification of protein (70 out of 101 analytes) in the epidermal layer by cytokine-, chemokine- and protease-Proteome Profiler after 40 h incubation: Profiler membranes were loaded with 100  $\mu$ g total protein of epidermis lysates. (C) Table of upregulated inflammatory mediators which were found by mRNA/proteome profiling (shown in (A/B) and meet definition: individual values of all tested donors  $>1$ ).

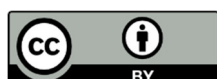

© 2020 by the authors. Submitted for possible open access publication under the terms and conditions of the Creative Commons Attribution (CC BY) license (<http://creativecommons.org/licenses/by/4.0/>).
